# Supplementary material for: Structural, electronic, and photophysical properties of thieno-expanded tricyclic purine analogs: a theoretical study
Source: Royal Society of Chemistry journal article supplement (doi:10.1039/c3cp54505a), 2014-01-01
Supplement: c3cp54505a.pdf [file c3cp54505a.pdf]

## Structural, Electronic, and Photophysical Properties of Thieno-Expanded Tricyclic Purine

### Analogs: A Theoretical Study

Laibin Zhang, Liuzhu Zhou, Jianxiang Tian,<sup>\*</sup> and Xiaoming Li

*School of Physics and Engineering, Qufu Normal University, Qufu, 273165, P. R. China*

### Supporting Information

#### Contents:

- Table S1 Changes in Bond Lengths of ttA and ttG after Excitation (Å).
- Table S2 Changes in Bond Lengths of ttX and ttHX after Excitation (Å).
- Figure S1 The B3LYP/6-311++G(d,p) optimized structures of hydrated thieno-expanded tricyclic nucleobase analogs.
- Figure S2 Molecular orbitals involved in the six lowest electronic singlet transitions of ttA calculated at the TD-B3LYP/6-311++G(d,p) level.
- Figure S3 Molecular orbitals involved in the six lowest electronic singlet transitions of ttG calculated at the TD-B3LYP/6-311++G(d,p) level.
- Figure S4 Molecular orbitals involved in the six lowest electronic singlet transitions of ttX calculated at the TD-B3LYP/6-311++G(d,p) level.
- Figure S5 Molecular orbitals involved in the six lowest electronic singlet transitions of ttHX calculated at the TD-B3LYP/6-311++G(d,p) level.
- Figure S6 The B3LYP/6-31+G(d,p) optimized structures of hydrated base pairs (distances in Å).

---

<sup>\*</sup> Correspondence to: J. Tian; E-mail: jianxiangtian@gmail.com

**TABLE S1:** Changes in Bond Lengths of ttA and ttG after Excitation (Å).

| ttA     |                |                |                                | ttG     |                |                |                                |
|---------|----------------|----------------|--------------------------------|---------|----------------|----------------|--------------------------------|
| Bond    | S <sub>0</sub> | S <sub>1</sub> | S <sub>1</sub> -S <sub>0</sub> | Bond    | S <sub>0</sub> | S <sub>1</sub> | S <sub>1</sub> -S <sub>0</sub> |
| n1-c2   | 1.323          | 1.352          | 0.029                          | n1-c2   | 1.358          | 1.375          | 0.017                          |
| c2-n3   | 1.309          | 1.289          | -0.020                         | c2-n3   | 1.283          | 1.289          | 0.006                          |
| n3-c4   | 1.333          | 1.365          | 0.032                          | c2-n2   | 1.362          | 1.363          | 0.001                          |
| c4-c5   | 1.389          | 1.440          | 0.051                          | n3-c4   | 1.366          | 1.347          | -0.019                         |
| c5-c6   | 1.398          | 1.395          | -0.003                         | c4-c5   | 1.371          | 1.475          | 0.104                          |
| c6-n6   | 1.355          | 1.365          | 0.010                          | c5-c6   | 1.434          | 1.423          | -0.011                         |
| n1-c6   | 1.323          | 1.322          | -0.001                         | c6-o6   | 1.192          | 1.199          | 0.007                          |
| c4-c3t  | 1.429          | 1.374          | -0.055                         | n1-c6   | 1.403          | 1.416          | 0.013                          |
| c2t-c3t | 1.354          | 1.433          | 0.079                          | c4-c3t  | 1.422          | 1.382          | -0.040                         |
| c2t-S1t | 1.742          | 1.759          | 0.017                          | c2t-c3t | 1.358          | 1.385          | 0.027                          |
| s1t-c5  | 1.767          | 1.798          | 0.031                          | c2t-S1t | 1.733          | 1.789          | 0.056                          |
| c2t-n7  | 1.356          | 1.326          | -0.03                          | s1t-c5  | 1.755          | 1.734          | -0.021                         |
| n7-c8   | 1.297          | 1.31           | 0.013                          | c2t-n7  | 1.359          | 1.335          | -0.024                         |
| c8-n9   | 1.351          | 1.372          | 0.021                          | n7-c8   | 1.296          | 1.306          | 0.010                          |
| c3t-n9  | 1.37           | 1.369          | -0.001                         | c8-n9   | 1.352          | 1.357          | 0.005                          |
|         |                |                |                                | c3t-n9  | 1.373          | 1.376          | 0.003                          |

**TABLE S2:** Changes in Bond Lengths of ttX and ttHX after Excitation (Å).

| ttX     |                |                |                                | ttHX    |                |                |                                |
|---------|----------------|----------------|--------------------------------|---------|----------------|----------------|--------------------------------|
| Bond    | S <sub>0</sub> | S <sub>1</sub> | S <sub>1</sub> -S <sub>0</sub> | Bond    | S <sub>0</sub> | S <sub>1</sub> | S <sub>1</sub> -S <sub>0</sub> |
| n1-c2   | 1.372          | 1.372          | 0.000                          | n1-c2   | 1.354          | 1.369          | 0.015                          |
| c2-n3   | 1.374          | 1.376          | 0.002                          | c2-n3   | 1.27           | 1.282          | 0.012                          |
| c2-o2   | 1.188          | 1.188          | 0.000                          | n3-c4   | 1.374          | 1.349          | -0.025                         |
| n3-c4   | 1.374          | 1.375          | 0.001                          | c4-c5   | 1.37           | 1.475          | 0.105                          |
| c4-c5   | 1.358          | 1.454          | 0.096                          | c5-c6   | 1.44           | 1.427          | -0.013                         |
| c5-c6   | 1.449          | 1.43           | -0.019                         | c6-o6   | 1.191          | 1.198          | 0.007                          |
| c6-o6   | 1.188          | 1.198          | 0.010                          | n1-c6   | 1.397          | 1.405          | 0.008                          |
| n1-c6   | 1.394          | 1.402          | 0.008                          | c4-c3t  | 1.421          | 1.38           | -0.041                         |
| c4-c3t  | 1.419          | 1.366          | -0.053                         | c2t-c3t | 1.359          | 1.392          | 0.033                          |
| c2t-c3t | 1.361          | 1.408          | 0.047                          | c2t-S1t | 1.733          | 1.787          | 0.054                          |
| c2t-S1t | 1.726          | 1.786          | 0.060                          | s1t-c5  | 1.749          | 1.741          | -0.008                         |
| s1t-c5  | 1.75           | 1.745          | -0.005                         | c2t-n7  | 1.359          | 1.333          | -0.026                         |
| c2t-n7  | 1.358          | 1.328          | -0.030                         | n7-c8   | 1.295          | 1.309          | 0.014                          |
| n7-c8   | 1.293          | 1.307          | 0.014                          | c8-n9   | 1.353          | 1.355          | 0.002                          |
| c8-n9   | 1.355          | 1.363          | 0.008                          | c3t-n9  | 1.372          | 1.375          | 0.003                          |
| c3t-n9  | 1.378          | 1.382          | 0.004                          |         |                |                |                                |

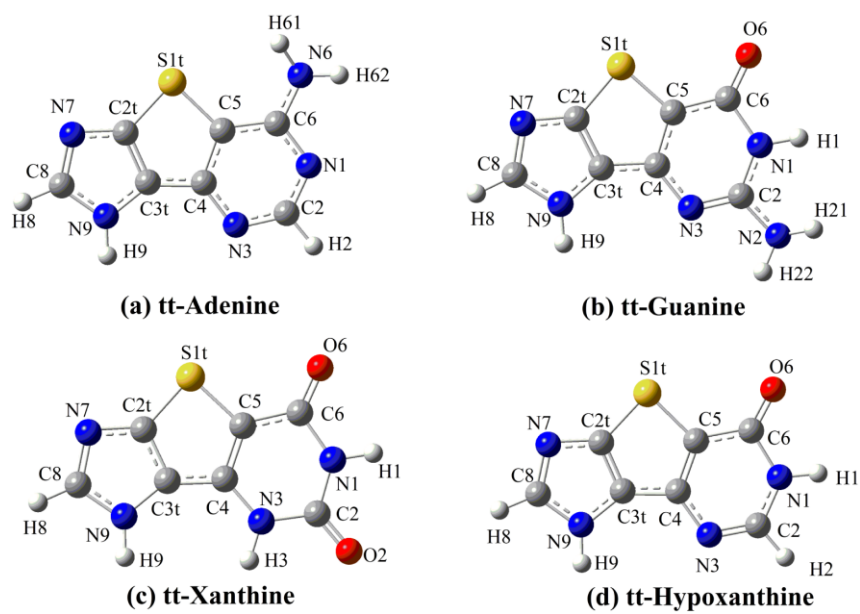

**Figure S1.** The B3LYP/6-311++G(d,p) optimized structures of thieno-expanded tricyclic nucleobase analogs: (a) tt-Adenine, (b) tt-Guanine, (c) tt-Xanthine, and (d) tt-Hypoxanthine.

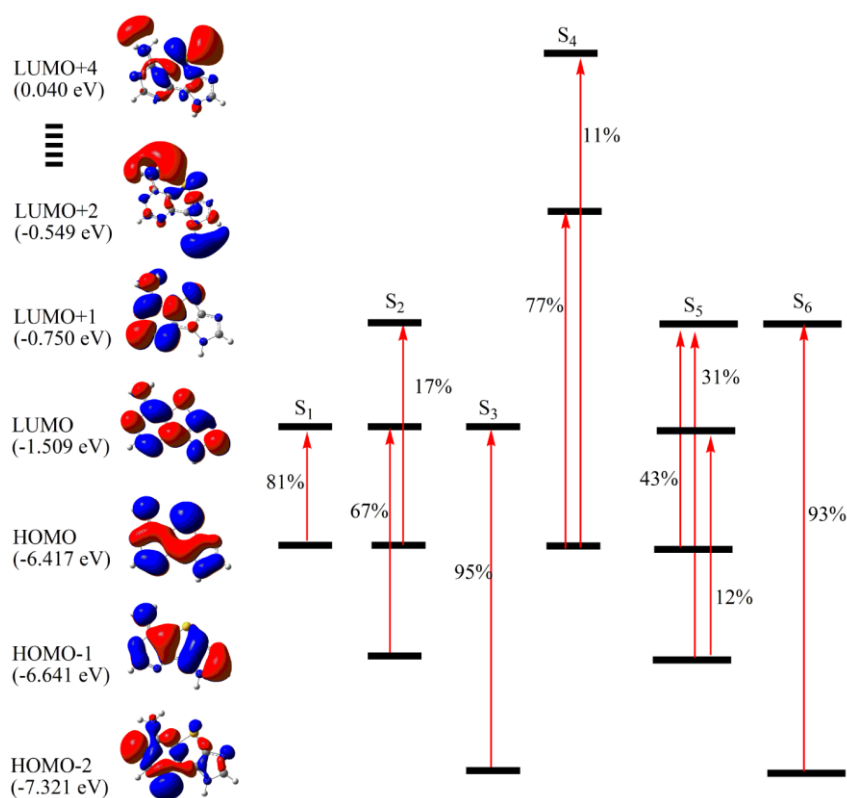

**Figure S2.** Molecular orbitals involved in the six lowest electronic singlet transitions of tTA calculated at the TD-B3LYP/6-311++G(d,p) level. Arrows indicate main contributions of the six lowest electronic singlet transitions and contributions larger than 10% are given. Orbital energies are given in parentheses.

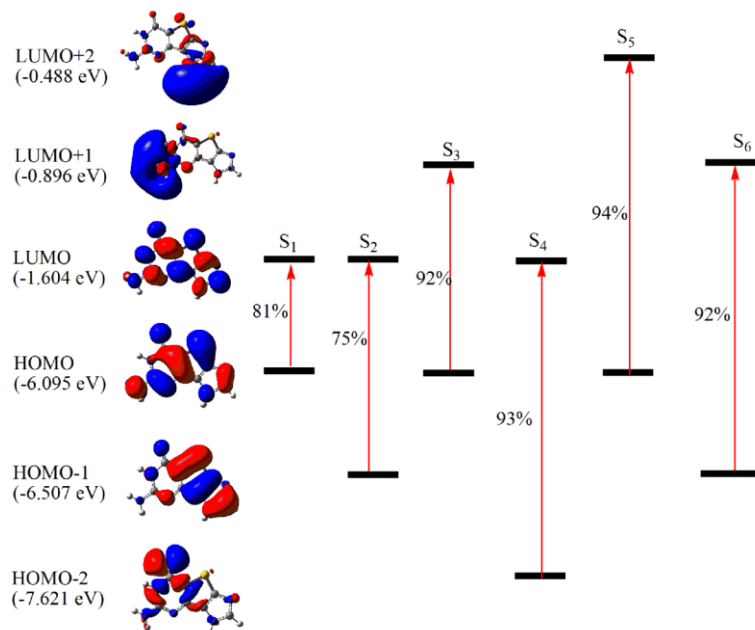

**Figure S3.** Molecular orbitals involved in the six lowest electronic singlet transitions of ttG calculated at the TD-B3LYP/6-311++G(d,p) level. Arrows indicate main contributions of the six lowest electronic singlet transitions and contributions larger than 10% are given. Orbital energies are given in parentheses.

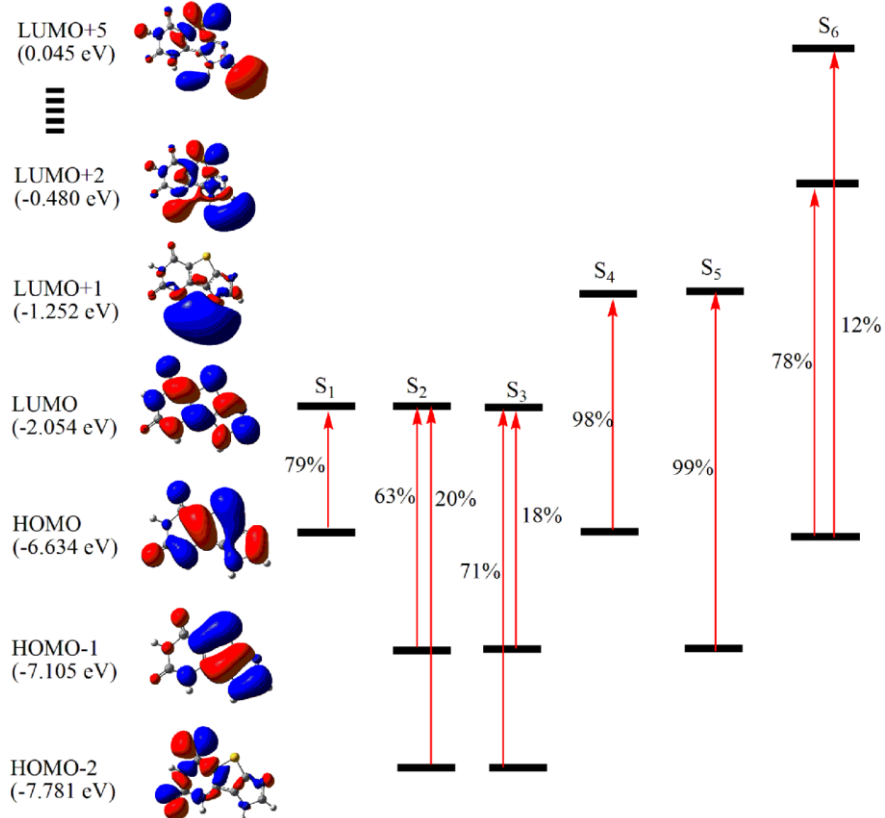

**Figure S4.** Molecular orbitals involved in the six lowest electronic singlet transitions of ttX calculated at the TD-B3LYP/6-311++G(d,p) level. Arrows indicate main contributions of the six lowest electronic singlet transitions and contributions larger than 10% are given. Orbital energies are given in parentheses.

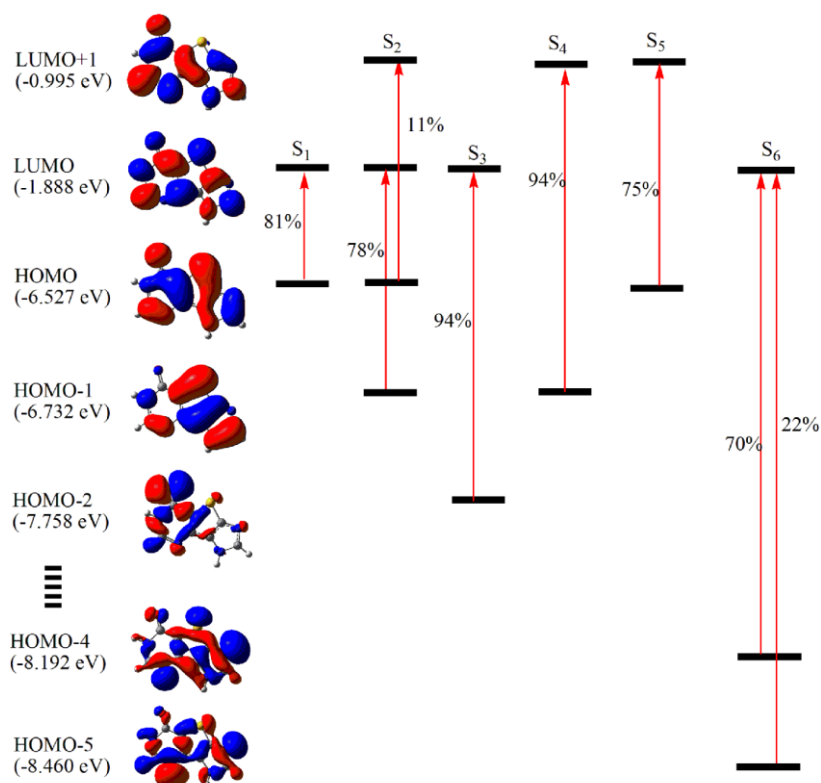

**Figure S5.** Molecular orbitals involved in the six lowest electronic singlet transitions of ttHX calculated at the TD-B3LYP/6-311++G(d,p) level. Arrows indicate main contributions of the six lowest electronic singlet transitions and contributions larger than 10% are given. Orbital energies are given in parentheses.



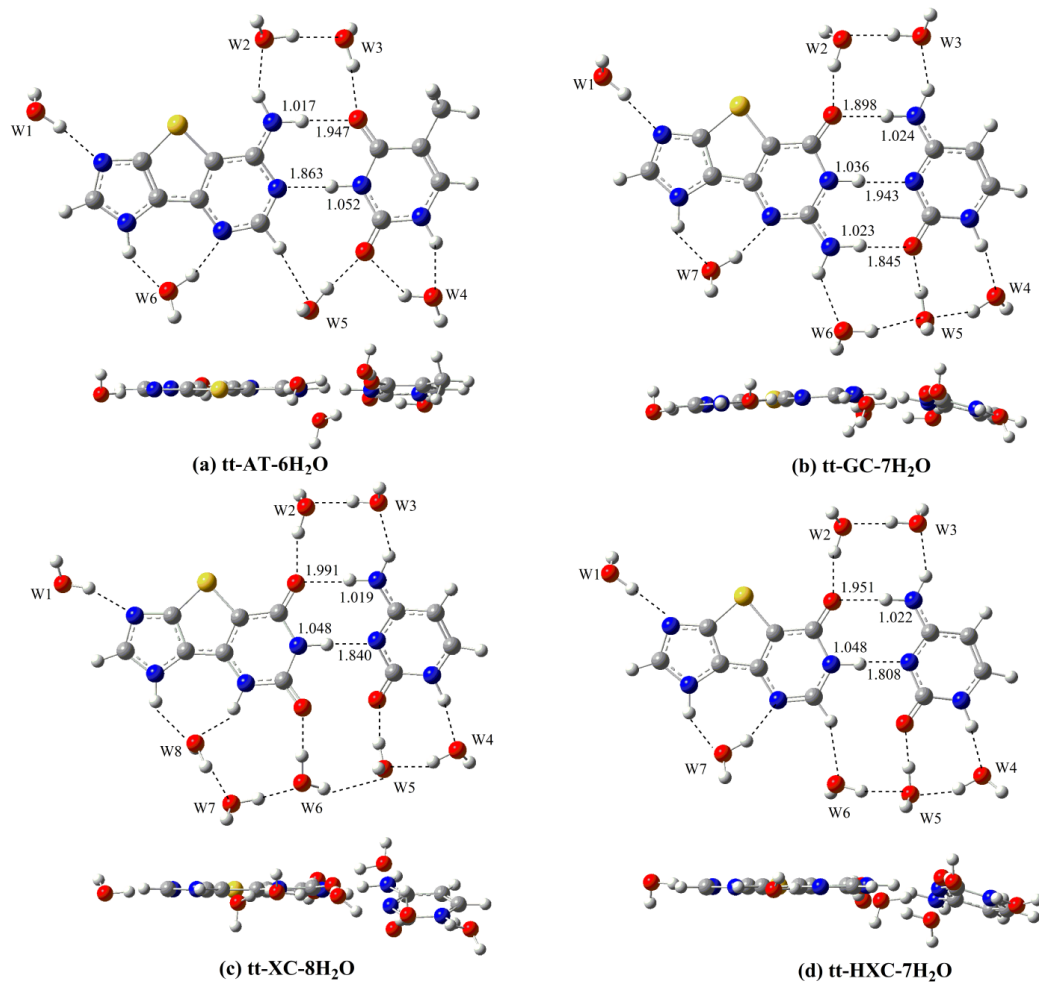

**Figure S6.** The B3LYP/6-31+G(d,p) optimized structures of hydrated base pairs (distances in Å).
